# Supplementary material
Source: publisher site journal article supplement (https://www.dovepress.com/article/385308)
Supplement: Supplementary file 1 [file get_supplementary_file.php]

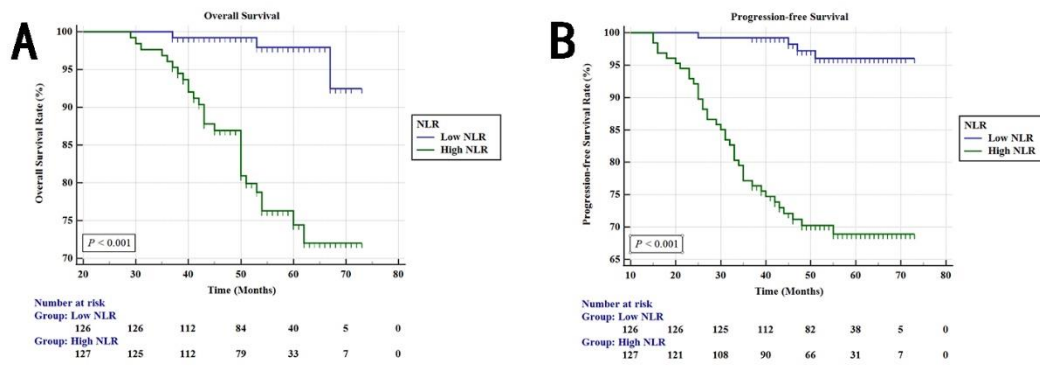

**Supplementary Figure 1.** Kaplan-Meier analysis for (A) OS and (B) PFS of PCa patients according to NLR.

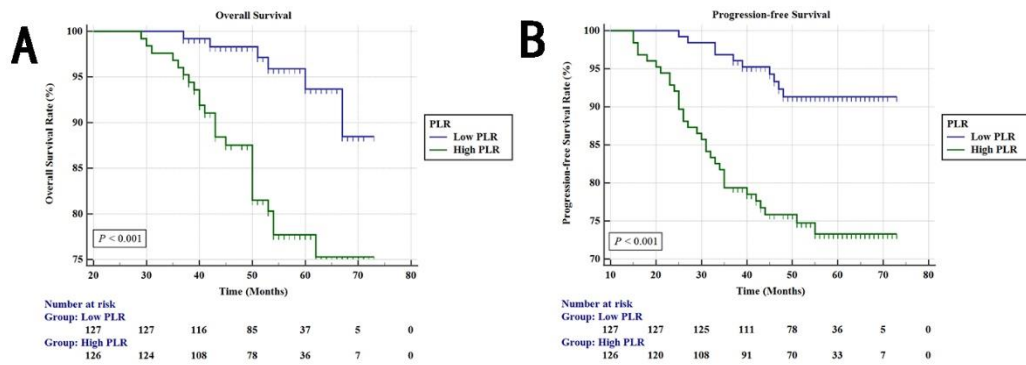

**Supplementary Figure 2.** Kaplan-Meier analysis for (A) OS and (B) PFS of PCa patients according to PLR.

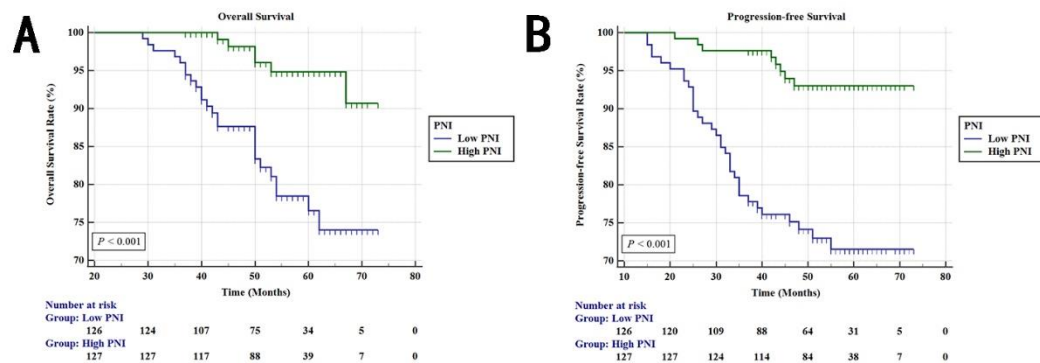

**Supplementary Figure 3.** Kaplan-Meier analysis for (A) OS and (B) PFS of PCa patients according to PNI.
